# Supplementary material for: Physical Fitness of Chinese Primary School Students across the Coronavirus (COVID-19) Outbreak: A Retrospective Repeated Cross-Sectional Study
Source: MDPI journal article supplement (doi:10.3390/ijerph19137870), 2022-06-27
Supplement: s1 [file s1]

**Table S1. National Student Physical Fitness Standard of China Conversion table of indicators for the calculation of overall physical fitness score.**

Body Mass Index (Male)

| Normalized | Grader    |           |           |           |           |           |
|------------|-----------|-----------|-----------|-----------|-----------|-----------|
| Score      | 1         | 2         | 3         | 4         | 5         | 6         |
| 100        | 13.5~18.1 | 13.7~18.4 | 13.9~19.4 | 14.2~20.1 | 14.4~21.4 | 14.7~21.8 |
| 80         | ≤13.4     | ≤13.6     | ≤13.8     | ≤14.1     | ≤14.3     | ≤14.6     |
| 80         | 18.2~20.3 | 18.5~20.4 | 19.5~22.1 | 20.2~22.6 | 21.5~24.1 | 21.9~24.5 |
| 60         | ≥20.4     | ≥20.5     | ≥22.2     | ≥22.7     | ≥24.2     | ≥24.6     |

Body Mass Index (Female)

| Normalized | Grader    |           |           |           |           |           |
|------------|-----------|-----------|-----------|-----------|-----------|-----------|
| Score      | 1         | 2         | 3         | 4         | 5         | 6         |
| 100        | 13.3~17.3 | 13.5~17.8 | 13.6~18.6 | 13.7~19.4 | 13.8~20.5 | 14.2~20.8 |
| 80         | ≤13.2     | ≤13.4     | ≤13.5     | ≤13.6     | ≤13.7     | ≤14.1     |
| 80         | 17.4~19.2 | 17.9~20.2 | 18.7~21.1 | 19.5~22.0 | 20.6~22.9 | 20.9~23.6 |
| 60         | ≥19.3     | ≥20.3     | ≥21.2     | ≥22.1     | ≥23.0     | ≥23.7     |

Lung Vital Capacity (Male)

| Normalized | Grader |      |      |      |      |      |
|------------|--------|------|------|------|------|------|
| Score      | 1      | 2    | 3    | 4    | 5    | 6    |
| 100        | 1700   | 2000 | 2300 | 2600 | 2900 | 3200 |
| 95         | 1600   | 1900 | 2200 | 2500 | 2800 | 3100 |
| 90         | 1500   | 1800 | 2100 | 2400 | 2700 | 3000 |
| 85         | 1400   | 1650 | 1900 | 2150 | 2450 | 2750 |
| 80         | 1300   | 1500 | 1700 | 1900 | 2200 | 2500 |
| 78         | 1240   | 1430 | 1620 | 1820 | 2110 | 2400 |
| 76         | 1180   | 1360 | 1540 | 1740 | 2020 | 2300 |
| 74         | 1120   | 1290 | 1460 | 1660 | 1930 | 2200 |
| 72         | 1060   | 1220 | 1380 | 1580 | 1840 | 2100 |
| 70         | 1000   | 1150 | 1300 | 1500 | 1750 | 2000 |
| 68         | 940    | 1080 | 1220 | 1420 | 1660 | 1900 |
| 66         | 880    | 1010 | 1140 | 1340 | 1570 | 1800 |
| 64         | 820    | 940  | 1060 | 1260 | 1480 | 1700 |
| 62         | 760    | 870  | 980  | 1180 | 1390 | 1600 |
| 60         | 700    | 800  | 900  | 1100 | 1300 | 1500 |
| 50         | 660    | 750  | 840  | 1030 | 1220 | 1410 |
| 40         | 620    | 700  | 780  | 960  | 1140 | 1320 |
| 30         | 580    | 650  | 720  | 890  | 1060 | 1230 |
| 20         | 540    | 600  | 660  | 820  | 980  | 1140 |
| 10         | 500    | 550  | 600  | 750  | 900  | 1050 |

### Lung Vital Capacity (Female)

| Normalized<br>Score | Grader |      |      |      |      |      |
|---------------------|--------|------|------|------|------|------|
|                     | 1      | 2    | 3    | 4    | 5    | 6    |
| 100                 | 1400   | 1600 | 1800 | 2000 | 2250 | 2500 |
| 95                  | 1300   | 1500 | 1700 | 1900 | 2150 | 2400 |
| 90                  | 1200   | 1400 | 1600 | 1800 | 2050 | 2300 |
| 85                  | 1100   | 1300 | 1500 | 1700 | 1950 | 2200 |
| 80                  | 1000   | 1200 | 1400 | 1600 | 1850 | 2100 |
| 78                  | 960    | 1150 | 1340 | 1530 | 1770 | 2010 |
| 76                  | 920    | 1100 | 1280 | 1460 | 1690 | 1920 |
| 74                  | 880    | 1050 | 1220 | 1390 | 1610 | 1830 |
| 72                  | 840    | 1000 | 1160 | 1320 | 1530 | 1740 |
| 70                  | 800    | 950  | 1100 | 1250 | 1450 | 1650 |
| 68                  | 760    | 900  | 1040 | 1180 | 1370 | 1560 |
| 66                  | 720    | 850  | 980  | 1110 | 1290 | 1470 |
| 64                  | 680    | 800  | 920  | 1040 | 1210 | 1380 |
| 62                  | 640    | 750  | 860  | 970  | 1130 | 1290 |
| 60                  | 600    | 700  | 800  | 900  | 1050 | 1200 |
| 50                  | 580    | 680  | 780  | 880  | 1020 | 1170 |
| 40                  | 560    | 660  | 760  | 860  | 990  | 1140 |
| 30                  | 540    | 640  | 740  | 840  | 960  | 1110 |
| 20                  | 520    | 620  | 720  | 820  | 930  | 1080 |
| 10                  | 500    | 600  | 700  | 800  | 900  | 1050 |

### 50m Sprint (Male)

| Normalized<br>Score | Grader |      |      |      |      |      |
|---------------------|--------|------|------|------|------|------|
|                     | 1      | 2    | 3    | 4    | 5    | 6    |
| 100                 | 10.2   | 9.6  | 9.1  | 8.7  | 8.4  | 8.2  |
| 95                  | 10.3   | 9.7  | 9.2  | 8.8  | 8.5  | 8.3  |
| 90                  | 10.4   | 9.8  | 9.3  | 8.9  | 8.6  | 8.4  |
| 85                  | 10.5   | 9.9  | 9.4  | 9    | 8.7  | 8.5  |
| 80                  | 10.6   | 10   | 9.5  | 9.1  | 8.8  | 8.6  |
| 78                  | 10.8   | 10.2 | 9.7  | 9.3  | 9    | 8.8  |
| 76                  | 11     | 10.4 | 9.9  | 9.5  | 9.2  | 9    |
| 74                  | 11.2   | 10.6 | 10.1 | 9.7  | 9.4  | 9.2  |
| 72                  | 11.4   | 10.8 | 10.3 | 9.9  | 9.6  | 9.4  |
| 70                  | 11.6   | 11   | 10.5 | 10.1 | 9.8  | 9.6  |
| 68                  | 11.8   | 11.2 | 10.7 | 10.3 | 10   | 9.8  |
| 66                  | 12     | 11.4 | 10.9 | 10.5 | 10.2 | 10   |
| 64                  | 12.2   | 11.6 | 11.1 | 10.7 | 10.4 | 10.2 |
| 62                  | 12.4   | 11.8 | 11.3 | 10.9 | 10.6 | 10.4 |
| 60                  | 12.6   | 12   | 11.5 | 11.1 | 10.8 | 10.6 |
| 50                  | 12.8   | 12.2 | 11.7 | 11.3 | 11   | 10.8 |
| 40                  | 13     | 12.4 | 11.9 | 11.5 | 11.2 | 11   |
| 30                  | 13.2   | 12.6 | 12.1 | 11.7 | 11.4 | 11.2 |

|    |      |      |      |      |      |      |
|----|------|------|------|------|------|------|
| 20 | 13.4 | 12.8 | 12.3 | 11.9 | 11.6 | 11.4 |
| 10 | 13.6 | 13   | 12.5 | 12.1 | 11.8 | 11.6 |

#### 50m Sprint (Female)

| Normalized<br>Score | Grader |      |      |      |      |      |
|---------------------|--------|------|------|------|------|------|
|                     | 1      | 2    | 3    | 4    | 5    | 6    |
| 100                 | 11     | 10   | 9.2  | 8.7  | 8.3  | 8.2  |
| 95                  | 11.1   | 10.1 | 9.3  | 8.8  | 8.4  | 8.3  |
| 90                  | 11.2   | 10.2 | 9.4  | 8.9  | 8.5  | 8.4  |
| 85                  | 11.5   | 10.5 | 9.7  | 9.2  | 8.8  | 8.7  |
| 80                  | 11.8   | 10.8 | 10   | 9.5  | 9.1  | 9    |
| 78                  | 12     | 11   | 10.2 | 9.7  | 9.3  | 9.2  |
| 76                  | 12.2   | 11.2 | 10.4 | 9.9  | 9.5  | 9.4  |
| 74                  | 12.4   | 11.4 | 10.6 | 10.1 | 9.7  | 9.6  |
| 72                  | 12.6   | 11.6 | 10.8 | 10.3 | 9.9  | 9.8  |
| 70                  | 12.8   | 11.8 | 11   | 10.5 | 10.1 | 10   |
| 68                  | 13     | 12   | 11.2 | 10.7 | 10.3 | 10.2 |
| 66                  | 13.2   | 12.2 | 11.4 | 10.9 | 10.5 | 10.4 |
| 64                  | 13.4   | 12.4 | 11.6 | 11.1 | 10.7 | 10.6 |
| 62                  | 13.6   | 12.6 | 11.8 | 11.3 | 10.9 | 10.8 |
| 60                  | 13.8   | 12.8 | 12   | 11.5 | 11.1 | 11   |
| 50                  | 14     | 13   | 12.2 | 11.7 | 11.3 | 11.2 |
| 40                  | 14.2   | 13.2 | 12.4 | 11.9 | 11.5 | 11.4 |
| 30                  | 14.4   | 13.4 | 12.6 | 12.1 | 11.7 | 11.6 |
| 20                  | 14.6   | 13.6 | 12.8 | 12.3 | 11.9 | 11.8 |
| 10                  | 14.8   | 13.8 | 13   | 12.5 | 12.1 | 12   |

#### Sit-and-Reach (Male)

| Normalized<br>Score | Grader |      |      |      |      |      |
|---------------------|--------|------|------|------|------|------|
|                     | 1      | 2    | 3    | 4    | 5    | 6    |
| 100                 | 16.1   | 16.2 | 16.3 | 16.4 | 16.5 | 16.6 |
| 95                  | 14.6   | 14.7 | 14.9 | 15   | 15.2 | 15.3 |
| 90                  | 13     | 13.2 | 13.4 | 13.6 | 13.8 | 14   |
| 85                  | 12     | 11.9 | 11.8 | 11.7 | 11.6 | 11.5 |
| 80                  | 11     | 10.6 | 10.2 | 9.8  | 9.4  | 9    |
| 78                  | 9.9    | 9.5  | 9.1  | 8.6  | 8.2  | 7.7  |
| 76                  | 8.8    | 8.4  | 8    | 7.4  | 7    | 6.4  |
| 74                  | 7.7    | 7.3  | 6.9  | 6.2  | 5.8  | 5.1  |
| 72                  | 6.6    | 6.2  | 5.8  | 5    | 4.6  | 3.8  |
| 70                  | 5.5    | 5.1  | 4.7  | 3.8  | 3.4  | 2.5  |
| 68                  | 4.4    | 4    | 3.6  | 2.6  | 2.2  | 1.2  |
| 66                  | 3.3    | 2.9  | 2.5  | 1.4  | 1    | -0.1 |
| 64                  | 2.2    | 1.8  | 1.4  | 0.2  | -0.2 | -1.4 |
| 62                  | 1.1    | 0.7  | 0.3  | -1   | -1.4 | -2.7 |

|    |      |      |      |      |      |    |
|----|------|------|------|------|------|----|
| 60 | 0    | -0.4 | -0.8 | -2.2 | -2.6 | -4 |
| 50 | -0.8 | -1.2 | -1.6 | -3.2 | -3.6 | -5 |
| 40 | -1.6 | -2   | -2.4 | -4.2 | -4.6 | -6 |
| 30 | -2.4 | -2.8 | -3.2 | -5.2 | -5.6 | -7 |
| 20 | -3.2 | -3.6 | -4   | -6.2 | -6.6 | -8 |
| 10 | -4   | -4.4 | -4.8 | -7.2 | -7.6 | -9 |

#### Sit-and-Reach (Female)

| Normalized<br>Score | Grader |      |      |      |      |      |
|---------------------|--------|------|------|------|------|------|
|                     | 1      | 2    | 3    | 4    | 5    | 6    |
| 100                 | 18.6   | 18.9 | 19.2 | 19.5 | 19.8 | 19.9 |
| 95                  | 17.3   | 17.6 | 17.9 | 18.1 | 18.5 | 18.7 |
| 90                  | 16     | 16.3 | 16.6 | 16.9 | 17.2 | 17.5 |
| 85                  | 14.7   | 14.8 | 14.9 | 15   | 15.1 | 15.2 |
| 80                  | 13.4   | 13.3 | 13.2 | 13.1 | 13   | 12.9 |
| 78                  | 12.3   | 12.2 | 12.1 | 12   | 11.9 | 11.8 |
| 76                  | 11.2   | 11.1 | 11   | 10.9 | 10.8 | 10.7 |
| 74                  | 10.1   | 10   | 9.9  | 9.8  | 9.7  | 9.6  |
| 72                  | 9      | 8.9  | 8.8  | 8.7  | 8.6  | 8.5  |
| 70                  | 7.9    | 7.8  | 7.7  | 7.6  | 7.5  | 7.4  |
| 68                  | 6.8    | 6.7  | 6.6  | 6.5  | 6.4  | 6.3  |
| 66                  | 5.7    | 5.6  | 5.5  | 5.4  | 5.3  | 5.2  |
| 64                  | 4.6    | 4.5  | 4.4  | 4.3  | 4.2  | 4.1  |
| 62                  | 3.5    | 3.4  | 3.3  | 3.2  | 3.1  | 3    |
| 60                  | 2.4    | 2.3  | 2.2  | 2.1  | 2    | 1.9  |
| 50                  | 1.6    | 1.5  | 1.4  | 1.3  | 1.2  | 1.1  |
| 40                  | 0.8    | 0.7  | 0.6  | 0.5  | 0.4  | 0.3  |
| 30                  | 0      | -0.1 | -0.2 | -0.3 | -0.4 | -0.5 |
| 20                  | -0.8   | -0.9 | -1   | -1.1 | -1.2 | -1.3 |
| 10                  | -1.6   | -1.7 | -1.8 | -1.9 | -2   | -2.1 |

#### Rope-jumping (Male)

| Normalized<br>Score | Grader |     |     |     |     |     |
|---------------------|--------|-----|-----|-----|-----|-----|
|                     | 1      | 2   | 3   | 4   | 5   | 6   |
| 100                 | 109    | 117 | 126 | 137 | 148 | 157 |
| 95                  | 104    | 112 | 121 | 132 | 143 | 152 |
| 90                  | 99     | 107 | 116 | 127 | 138 | 147 |
| 85                  | 93     | 101 | 110 | 121 | 132 | 141 |
| 80                  | 87     | 95  | 104 | 115 | 126 | 135 |
| 78                  | 80     | 88  | 97  | 108 | 119 | 128 |
| 76                  | 73     | 81  | 90  | 101 | 112 | 121 |
| 74                  | 66     | 74  | 83  | 94  | 105 | 114 |
| 72                  | 59     | 67  | 76  | 87  | 98  | 107 |
| 70                  | 52     | 60  | 69  | 80  | 91  | 100 |

|    |    |    |    |    |    |    |
|----|----|----|----|----|----|----|
| 68 | 45 | 53 | 62 | 73 | 84 | 93 |
| 66 | 38 | 46 | 55 | 66 | 77 | 86 |
| 64 | 31 | 39 | 48 | 59 | 70 | 79 |
| 62 | 24 | 32 | 41 | 52 | 63 | 72 |
| 60 | 17 | 25 | 34 | 45 | 56 | 65 |
| 50 | 14 | 22 | 31 | 42 | 53 | 62 |
| 40 | 11 | 19 | 28 | 39 | 50 | 59 |
| 30 | 8  | 16 | 25 | 36 | 47 | 56 |
| 20 | 5  | 13 | 22 | 33 | 44 | 53 |
| 10 | 2  | 10 | 19 | 30 | 41 | 50 |

#### Rope-jumping (Female)

| Normalized<br>Score | Grader |     |     |     |     |     |
|---------------------|--------|-----|-----|-----|-----|-----|
|                     | 1      | 2   | 3   | 4   | 5   | 6   |
| 100                 | 117    | 127 | 139 | 149 | 158 | 166 |
| 95                  | 110    | 120 | 132 | 142 | 151 | 159 |
| 90                  | 103    | 113 | 125 | 135 | 144 | 152 |
| 85                  | 95     | 105 | 117 | 127 | 136 | 144 |
| 80                  | 87     | 97  | 109 | 119 | 128 | 136 |
| 78                  | 80     | 90  | 102 | 112 | 121 | 129 |
| 76                  | 73     | 83  | 95  | 105 | 114 | 122 |
| 74                  | 66     | 76  | 88  | 98  | 107 | 115 |
| 72                  | 59     | 69  | 81  | 91  | 100 | 108 |
| 70                  | 52     | 62  | 74  | 84  | 93  | 101 |
| 68                  | 45     | 55  | 67  | 77  | 86  | 94  |
| 66                  | 38     | 48  | 60  | 70  | 79  | 87  |
| 64                  | 31     | 41  | 53  | 63  | 72  | 80  |
| 62                  | 24     | 34  | 46  | 56  | 65  | 73  |
| 60                  | 17     | 27  | 39  | 49  | 58  | 66  |
| 50                  | 14     | 24  | 36  | 46  | 55  | 63  |
| 40                  | 11     | 21  | 33  | 43  | 52  | 60  |
| 30                  | 8      | 18  | 30  | 40  | 49  | 57  |
| 20                  | 5      | 15  | 27  | 37  | 46  | 54  |
| 10                  | 2      | 12  | 24  | 34  | 43  | 51  |

#### Rope-jumping Extra Bonus after exceeding 100 in rope-jumping item (Male)

| Normalized<br>Score | Grader |    |    |    |    |    |
|---------------------|--------|----|----|----|----|----|
|                     | 1      | 2  | 3  | 4  | 5  | 6  |
| 20                  | 40     | 40 | 40 | 40 | 40 | 40 |
| 19                  | 38     | 38 | 38 | 38 | 38 | 38 |
| 18                  | 36     | 36 | 36 | 36 | 36 | 36 |
| 17                  | 34     | 34 | 34 | 34 | 34 | 34 |
| 16                  | 32     | 32 | 32 | 32 | 32 | 32 |
| 15                  | 30     | 30 | 30 | 30 | 30 | 30 |

|    |    |    |    |    |    |    |
|----|----|----|----|----|----|----|
| 14 | 28 | 28 | 28 | 28 | 28 | 28 |
| 13 | 26 | 26 | 26 | 26 | 26 | 26 |
| 12 | 24 | 24 | 24 | 24 | 24 | 24 |
| 11 | 22 | 22 | 22 | 22 | 22 | 22 |
| 10 | 20 | 20 | 20 | 20 | 20 | 20 |
| 9  | 18 | 18 | 18 | 18 | 18 | 18 |
| 8  | 16 | 16 | 16 | 16 | 16 | 16 |
| 7  | 14 | 14 | 14 | 14 | 14 | 14 |
| 6  | 12 | 12 | 12 | 12 | 12 | 12 |
| 5  | 10 | 10 | 10 | 10 | 10 | 10 |
| 4  | 8  | 8  | 8  | 8  | 8  | 8  |
| 3  | 6  | 6  | 6  | 6  | 6  | 6  |
| 2  | 4  | 4  | 4  | 4  | 4  | 4  |
| 1  | 2  | 2  | 2  | 2  | 2  | 2  |

Rope-jumping Extra Bonus after exceeding 100 in rope-jumping item (Female)

| Normalized | Grader |    |    |    |    |    |
|------------|--------|----|----|----|----|----|
| Score      | 1      | 2  | 3  | 4  | 5  | 6  |
| 20         | 40     | 40 | 40 | 40 | 40 | 40 |
| 19         | 38     | 38 | 38 | 38 | 38 | 38 |
| 18         | 36     | 36 | 36 | 36 | 36 | 36 |
| 17         | 34     | 34 | 34 | 34 | 34 | 34 |
| 16         | 32     | 32 | 32 | 32 | 32 | 32 |
| 15         | 30     | 30 | 30 | 30 | 30 | 30 |
| 14         | 28     | 28 | 28 | 28 | 28 | 28 |
| 13         | 26     | 26 | 26 | 26 | 26 | 26 |
| 12         | 24     | 24 | 24 | 24 | 24 | 24 |
| 11         | 22     | 22 | 22 | 22 | 22 | 22 |
| 10         | 20     | 20 | 20 | 20 | 20 | 20 |
| 9          | 18     | 18 | 18 | 18 | 18 | 18 |
| 8          | 16     | 16 | 16 | 16 | 16 | 16 |
| 7          | 14     | 14 | 14 | 14 | 14 | 14 |
| 6          | 12     | 12 | 12 | 12 | 12 | 12 |
| 5          | 10     | 10 | 10 | 10 | 10 | 10 |
| 4          | 8      | 8  | 8  | 8  | 8  | 8  |
| 3          | 6      | 6  | 6  | 6  | 6  | 6  |
| 2          | 4      | 4  | 4  | 4  | 4  | 4  |
| 1          | 2      | 2  | 2  | 2  | 2  | 2  |

Sit-ups (Male)

| Normalized | Grader |   |   |   |
|------------|--------|---|---|---|
| Score      | 3      | 4 | 5 | 6 |

|     |    |    |    |    |
|-----|----|----|----|----|
| 100 | 48 | 49 | 50 | 51 |
| 95  | 45 | 46 | 47 | 48 |
| 90  | 42 | 43 | 44 | 45 |
| 85  | 39 | 40 | 41 | 42 |
| 80  | 36 | 37 | 38 | 39 |
| 78  | 34 | 35 | 36 | 37 |
| 76  | 32 | 33 | 34 | 35 |
| 74  | 30 | 31 | 32 | 33 |
| 72  | 28 | 29 | 30 | 31 |
| 70  | 26 | 27 | 28 | 29 |
| 68  | 24 | 25 | 26 | 27 |
| 66  | 22 | 23 | 24 | 25 |
| 64  | 20 | 21 | 22 | 23 |
| 62  | 18 | 19 | 20 | 21 |
| 60  | 16 | 17 | 18 | 19 |
| 50  | 14 | 15 | 16 | 17 |
| 40  | 12 | 13 | 14 | 15 |
| 30  | 10 | 11 | 12 | 13 |
| 20  | 8  | 9  | 10 | 11 |
| 10  | 6  | 7  | 8  | 9  |

Sit-ups (Female)

| Normalized | Grader |    |    |    |
|------------|--------|----|----|----|
| Score      | 3      | 4  | 5  | 6  |
| 100        | 46     | 47 | 48 | 49 |
| 95         | 44     | 45 | 46 | 47 |
| 90         | 42     | 43 | 44 | 45 |
| 85         | 39     | 40 | 41 | 42 |
| 80         | 36     | 37 | 38 | 39 |
| 78         | 34     | 35 | 36 | 37 |
| 76         | 32     | 33 | 34 | 35 |
| 74         | 30     | 31 | 32 | 33 |
| 72         | 28     | 29 | 30 | 31 |
| 70         | 26     | 27 | 28 | 29 |
| 68         | 24     | 25 | 26 | 27 |
| 66         | 22     | 23 | 24 | 25 |
| 64         | 20     | 21 | 22 | 23 |
| 62         | 18     | 19 | 20 | 21 |
| 60         | 16     | 17 | 18 | 19 |
| 50         | 14     | 15 | 16 | 17 |
| 40         | 12     | 13 | 14 | 15 |
| 30         | 10     | 11 | 12 | 13 |
| 20         | 8      | 9  | 10 | 11 |
| 10         | 6      | 7  | 8  | 9  |

# Shuttle Run (Male)

| Normalized | Grader |       |
|------------|--------|-------|
| Score      | 5      | 6     |
| 100        | 1'36"  | 1'30" |
| 95         | 1'39"  | 1'33" |
| 90         | 1'42"  | 1'36" |
| 85         | 1'45"  | 1'39" |
| 80         | 1'48"  | 1'42" |
| 78         | 1'51"  | 1'45" |
| 76         | 1'54"  | 1'48" |
| 74         | 1'57"  | 1'51" |
| 72         | 2'00"  | 1'54" |
| 70         | 2'03"  | 1'57" |
| 68         | 2'06"  | 2'00" |
| 66         | 2'09"  | 2'03" |
| 64         | 2'12"  | 2'06" |
| 62         | 2'15"  | 2'09" |
| 60         | 2'18"  | 2'12" |
| 50         | 2'22"  | 2'16" |
| 40         | 2'26"  | 2'20" |
| 30         | 2'30"  | 2'24" |
| 20         | 2'34"  | 2'28" |
| 10         | 2'38"  | 2'32" |

# Shuttle Run (Female)

| Normalized | Grader |       |
|------------|--------|-------|
| Score      | 5      | 6     |
| 100        | 1'41"  | 1'37" |
| 95         | 1'44"  | 1'40" |
| 90         | 1'47"  | 1'43" |
| 85         | 1'50"  | 1'46" |
| 80         | 1'53"  | 1'49" |
| 78         | 1'56"  | 1'52" |
| 76         | 1'59"  | 1'55" |
| 74         | 2'02"  | 1'58" |
| 72         | 2'05"  | 2'01" |
| 70         | 2'08"  | 2'04" |
| 68         | 2'11"  | 2'07" |
| 66         | 2'14"  | 2'10" |
| 64         | 2'17"  | 2'13" |
| 62         | 2'20"  | 2'16" |
| 60         | 2'23"  | 2'19" |
| 50         | 2'27"  | 2'23" |
| 40         | 2'31"  | 2'27" |
| 30         | 2'35"  | 2'31" |



|    |       |       |
|----|-------|-------|
| 20 | 2'39" | 2'35" |
| 10 | 2'43" | 2'39" |

---
